# Supplementary material
Source: ML conference proceedings conference paper supplement (https://openreview.net/forum?id=M5t0WvjfCg)
Supplement: supplementary_material [file attachment]

000  
001  
002  
003  
004  
005  
006  
007  
008  
009  
010  
011  
012  
013  
014  
015  
016  
017  
018  
019  
020  
021  
022  
023  
024  
025  
026  
027  
028  
029  
030  
031  
032  
033  
034  
035  
036  
037  
038  
039  
040  
041  
042  
043  
044  
045  
046  
047  
048  
049  
050  
051  
052  
053

# ADAIR: ADAPTIVE ALL-IN-ONE IMAGE RESTORATION VIA FREQUENCY MINING AND MODULATION —SUPPLEMENTARY MATERIAL

## **Anonymous authors**

Paper under double-blind review

In this supplementary material, we provide more qualitative results of the all-in-one setting and single-task setting for three image restoration tasks, including image deraining, dehazing, and denoising.

## REFERENCES

- Boyi Li, Wenqi Ren, Dengpan Fu, Dacheng Tao, Dan Feng, Wenjun Zeng, and Zhangyang Wang. Benchmarking single-image dehazing and beyond. *TIP*, 2018.
- Boyun Li, Xiao Liu, Peng Hu, Zhongqin Wu, Jiancheng Lv, and Xi Peng. All-in-one image restoration for unknown corruption. In *CVPR*, 2022.
- David Martin, Charless Fowlkes, Doron Tal, and Jitendra Malik. A database of human segmented natural images and its application to evaluating segmentation algorithms and measuring ecological statistics. In *ICCV*, 2001.
- Wenhan Yang, Robby T Tan, Jiashi Feng, Zongming Guo, Shuicheng Yan, and Jiaying Liu. Joint rain detection and removal from a single image with contextualized deep networks. *TPAMI*, 2019.

054  
 055  
 056  
 057  
 058  
 059  
 060  
 061  
 062  
 063  
 064  
 065  
 066  
 067  
 068  
 069  
 070  
 071  
 072  
 073  
 074  
 075  
 076  
 077  
 078  
 079  
 080  
 081  
 082  
 083  
 084  
 085  
 086  
 087  
 088  
 089  
 090  
 091  
 092  
 093  
 094  
 095  
 096  
 097  
 098  
 099  
 100  
 101  
 102  
 103  
 104  
 105  
 106  
 107

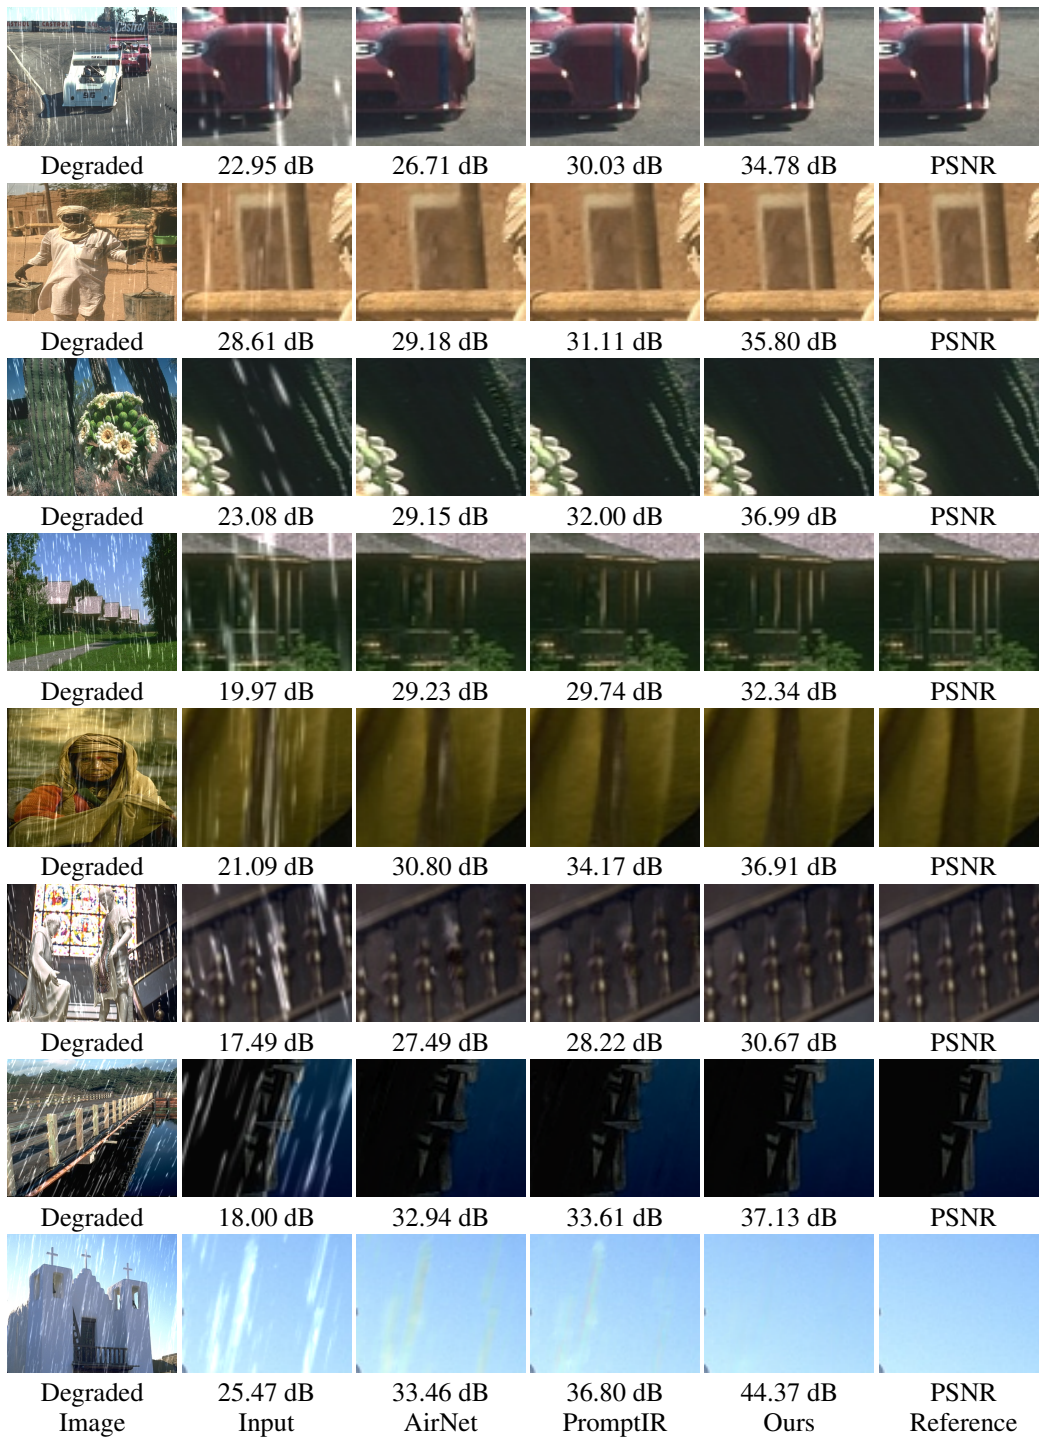

Figure 1: Image deraining comparisons on Rain100L (Yang et al., 2019) under the three-degradation setting.

108  
109  
110  
111  
112  
113  
114  
115  
116  
117  
118  
119  
120  
121  
122  
123  
124  
125  
126  
127  
128  
129  
130  
131  
132  
133  
134  
135  
136  
137  
138  
139  
140  
141  
142  
143  
144  
145  
146  
147  
148  
149  
150  
151  
152  
153  
154  
155  
156  
157  
158  
159  
160  
161

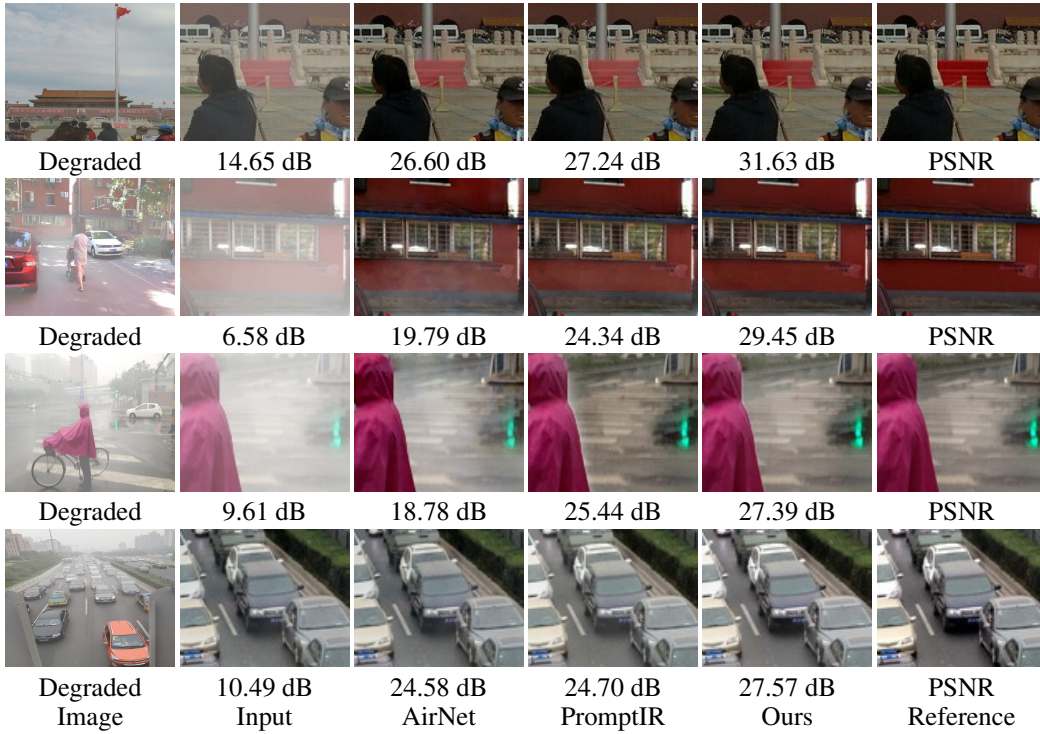

Figure 2: Image dehazing comparisons on SOTS (Li et al., 2018) under the three-degradation setting.

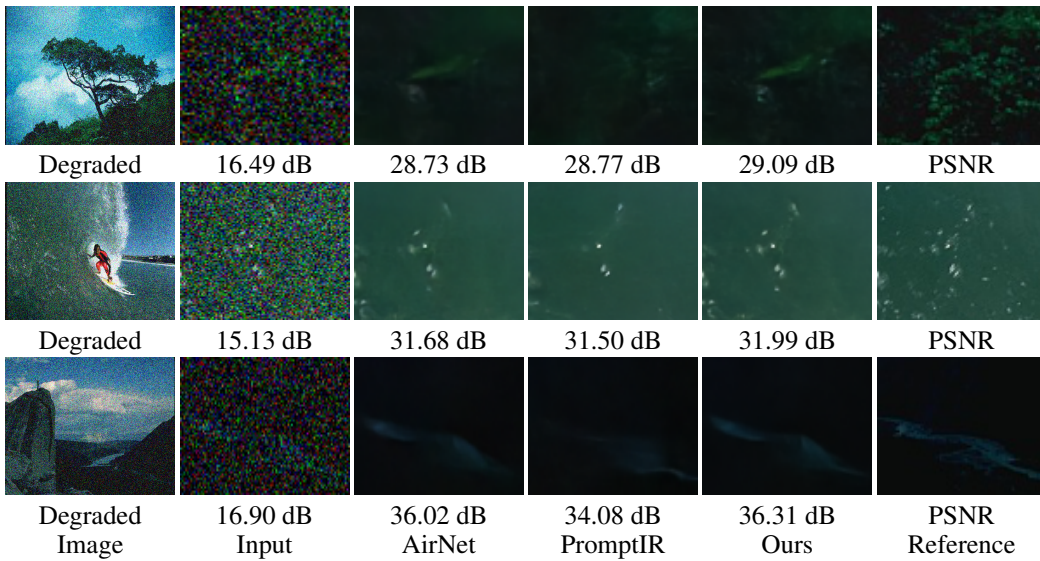

Figure 3: Image denoising comparisons on BSD68 (Martin et al., 2001) with  $\sigma = 50$  under the three-degradation setting.

162  
163  
164  
165  
166  
167  
168  
169  
170  
171  
172  
173  
174  
175  
176  
177  
178  
179  
180  
181  
182  
183  
184  
185  
186  
187  
188  
189  
190  
191  
192  
193  
194  
195  
196  
197  
198  
199  
200  
201  
202  
203  
204  
205  
206  
207  
208  
209  
210  
211  
212  
213  
214  
215

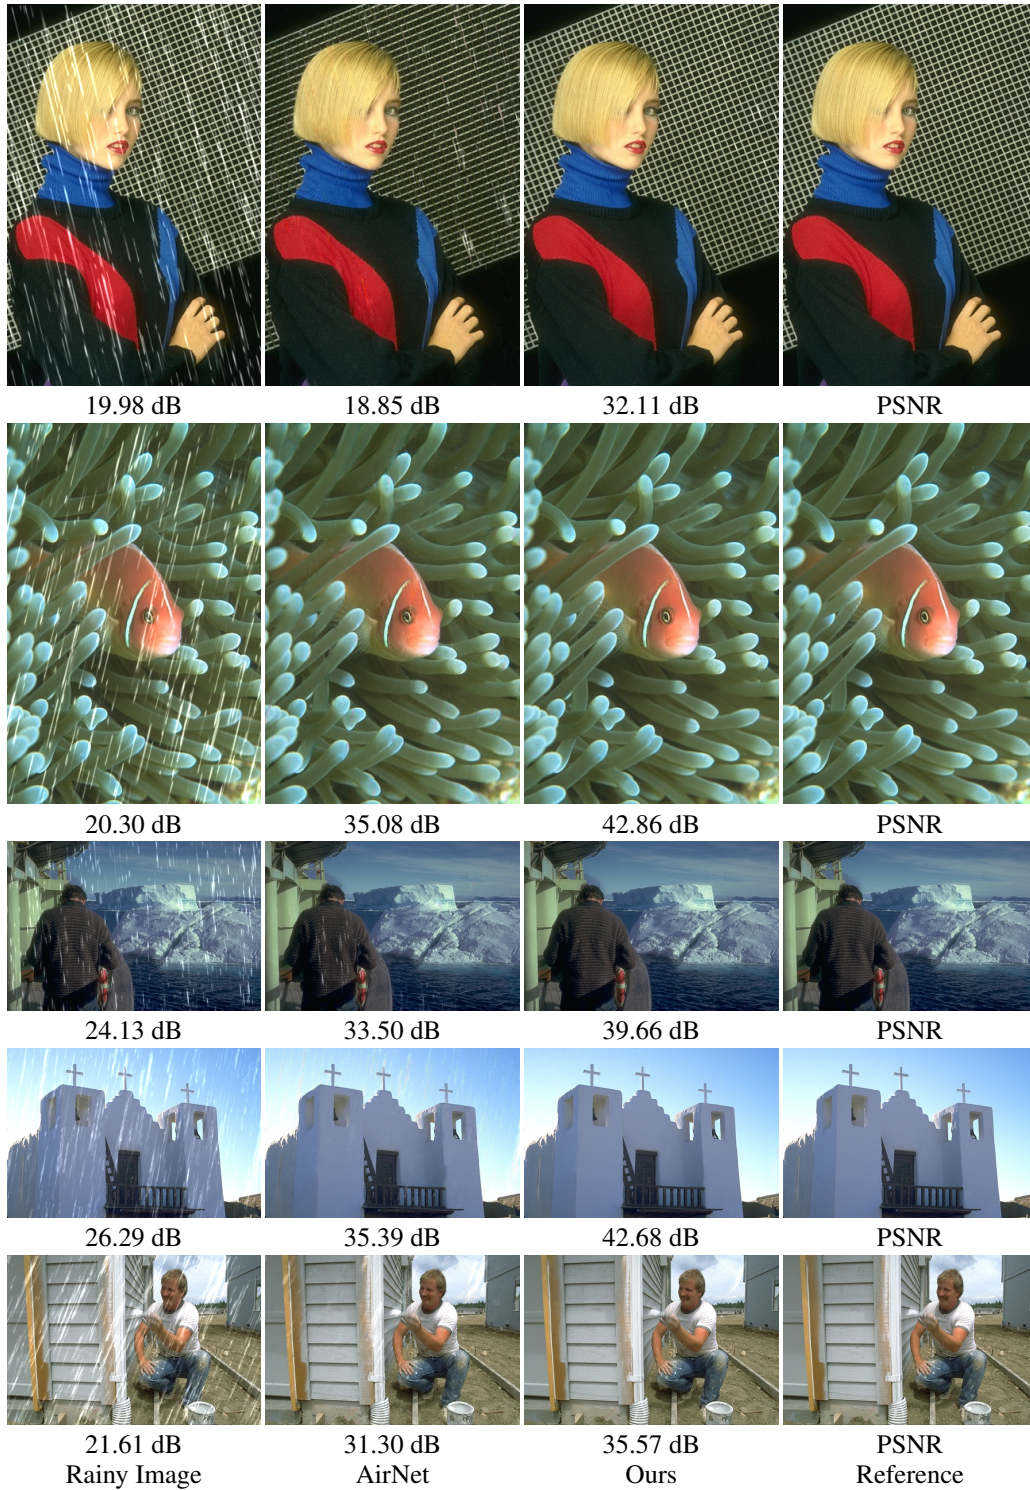

Figure 4: Image draining comparisons under the single task setting on Rain100L (Yang et al., 2019).

216  
217  
218  
219  
220  
221  
222  
223  
224  
225  
226  
227  
228  
229  
230  
231  
232  
233  
234  
235  
236  
237  
238  
239  
240  
241  
242  
243  
244  
245  
246  
247  
248  
249  
250  
251  
252  
253  
254  
255  
256  
257  
258  
259  
260  
261  
262  
263  
264  
265  
266  
267  
268  
269

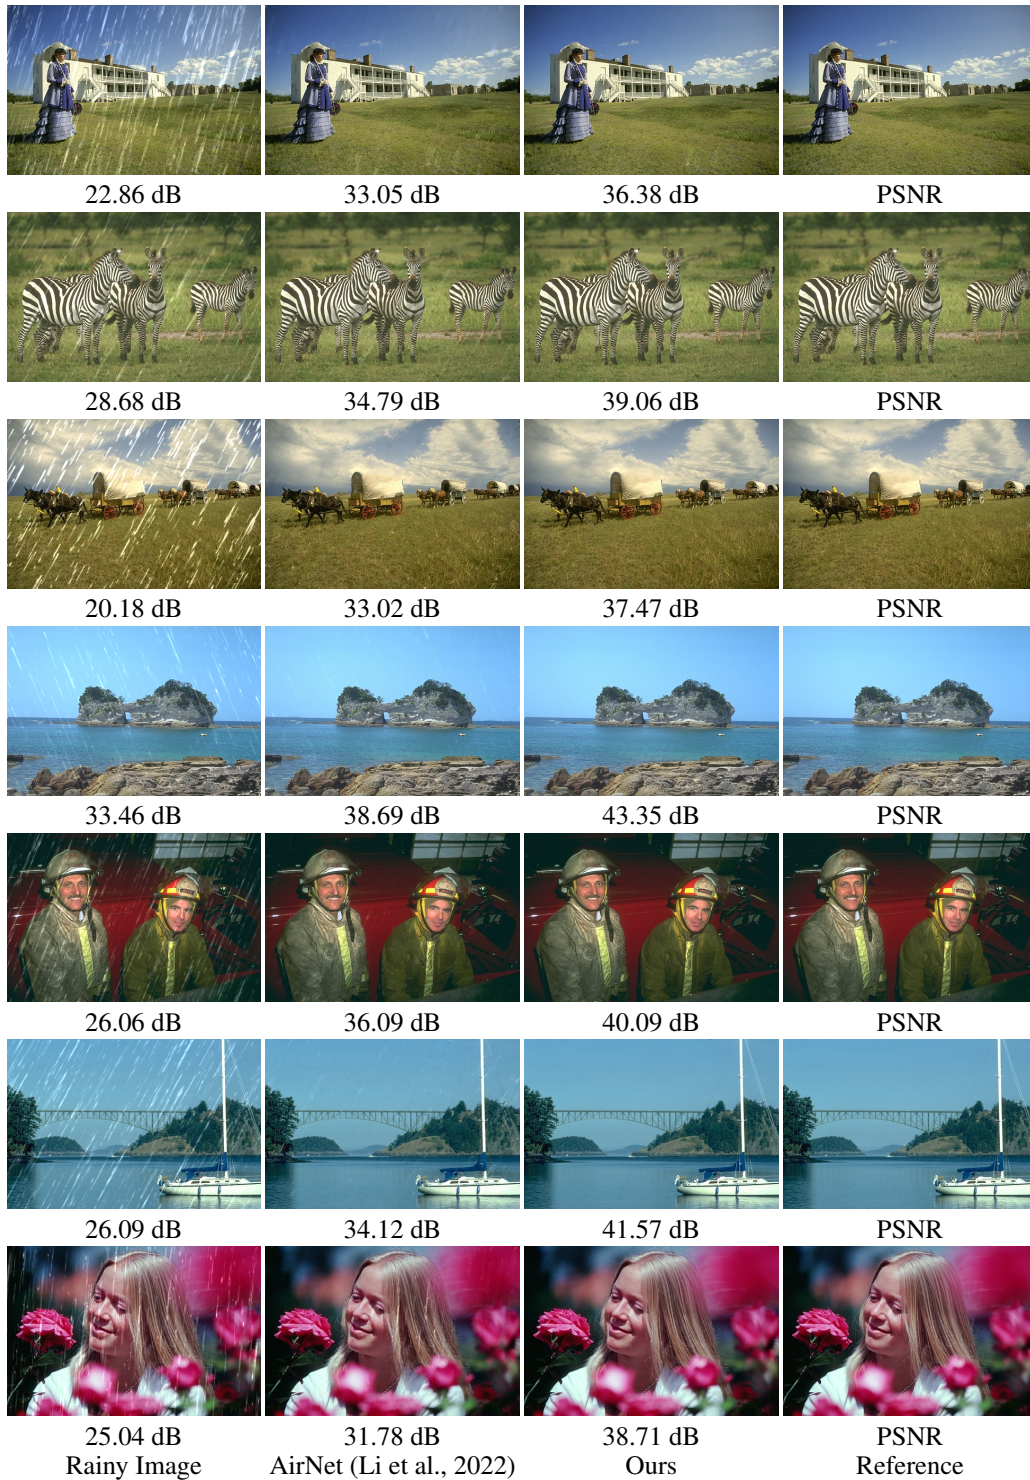

Figure 5: Image draining comparisons under the single task setting on Rain100L (Yang et al., 2019).

270  
271  
272  
273  
274  
275  
276  
277  
278  
279  
280  
281  
282  
283  
284  
285  
286  
287  
288  
289  
290  
291  
292  
293  
294  
295  
296  
297  
298  
299  
300  
301  
302  
303  
304  
305  
306  
307  
308  
309  
310  
311  
312  
313  
314  
315  
316  
317  
318  
319  
320  
321  
322  
323

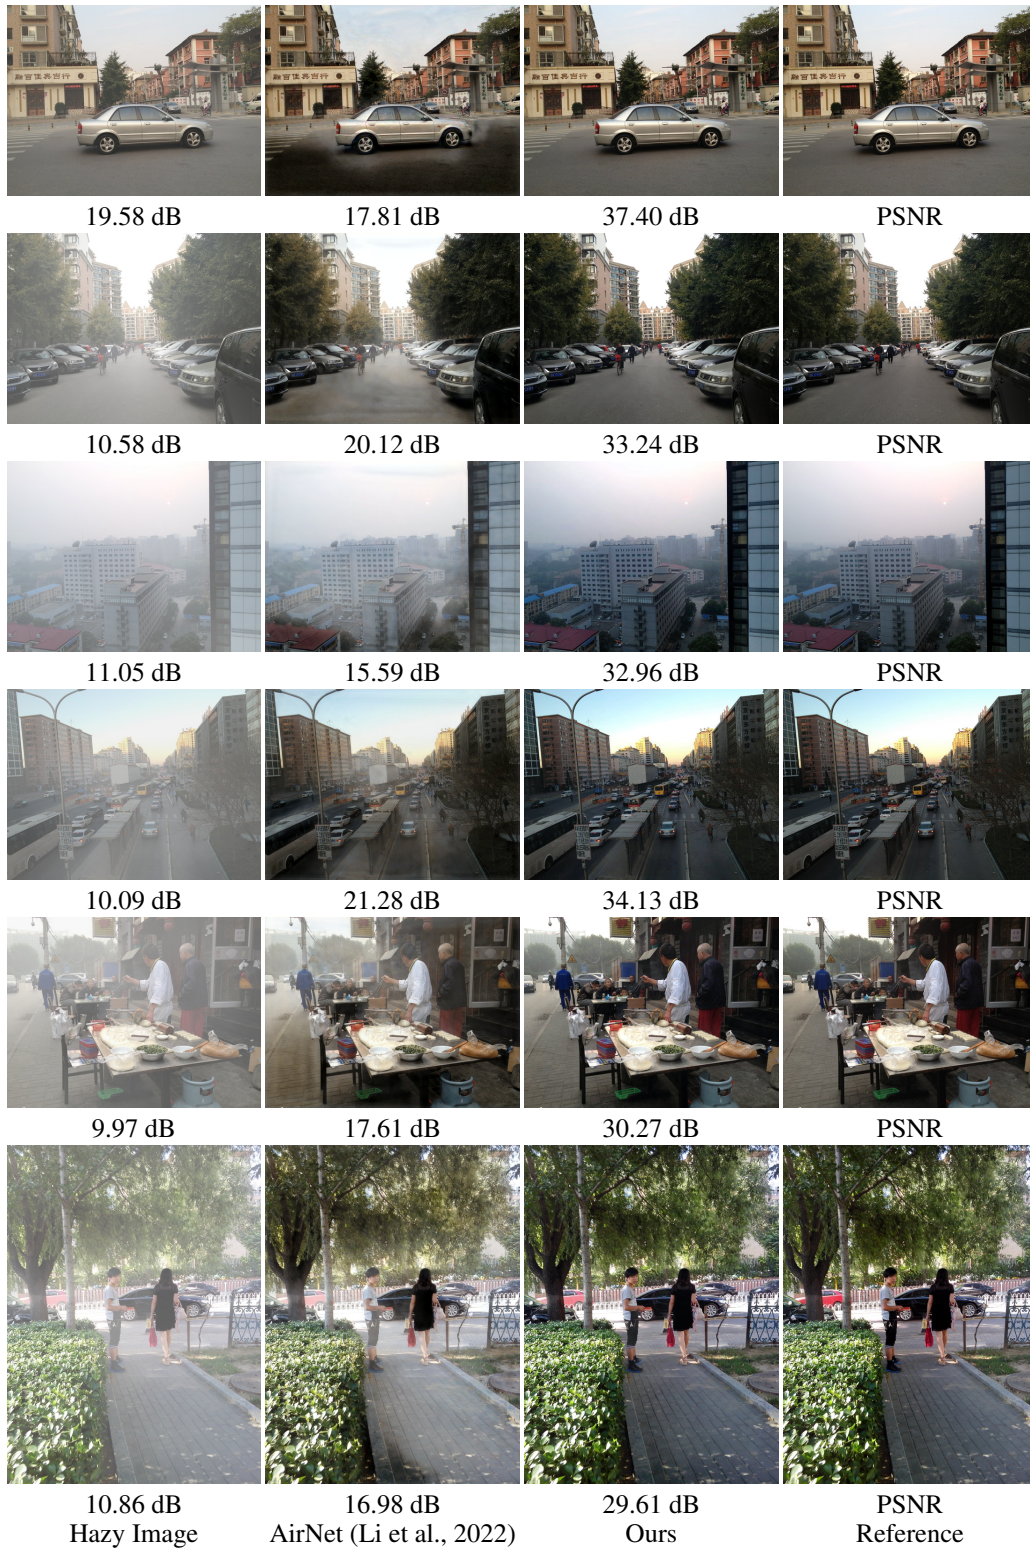

Figure 6: Image dehazing comparisons under the single task setting on SOTS (Li et al., 2018).

324  
325  
326  
327  
328  
329  
330  
331  
332  
333  
334  
335  
336  
337  
338  
339  
340  
341  
342  
343  
344  
345  
346  
347  
348  
349  
350  
351  
352  
353  
354  
355  
356  
357  
358  
359  
360  
361  
362  
363  
364  
365  
366  
367  
368  
369  
370  
371  
372  
373  
374  
375  
376  
377

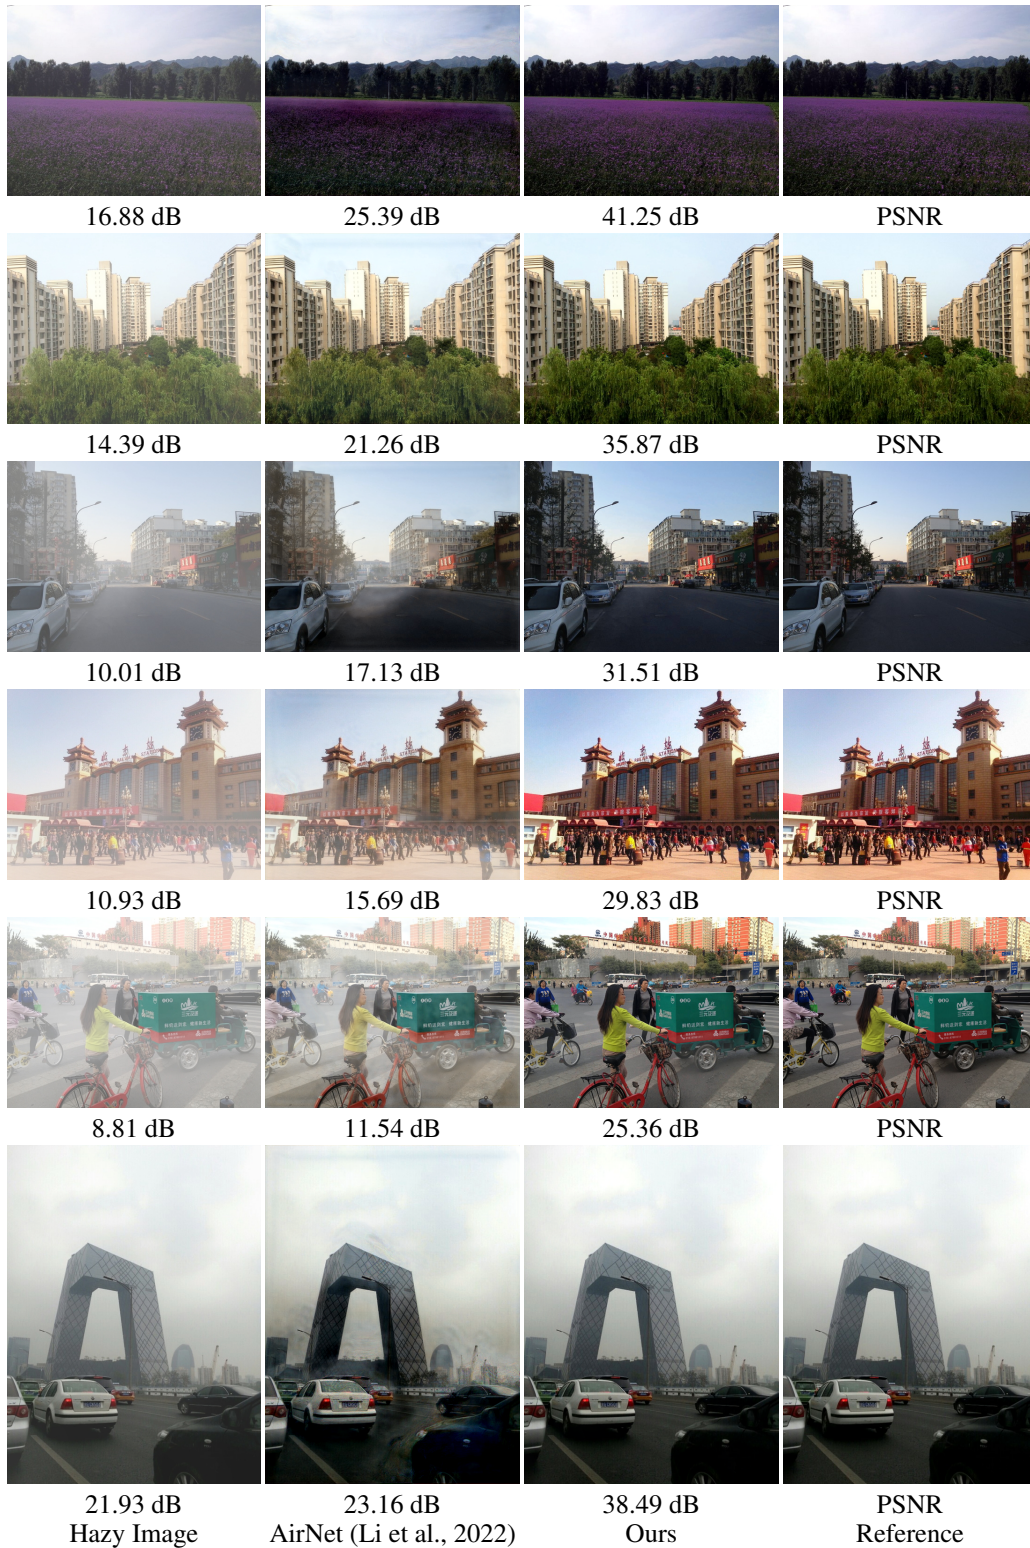

Figure 7: Image dehazing comparisons under the single task setting on SOTS (Li et al., 2018).

378  
 379  
 380  
 381  
 382  
 383  
 384  
 385  
 386  
 387  
 388  
 389  
 390  
 391  
 392  
 393  
 394  
 395  
 396  
 397  
 398  
 399  
 400  
 401  
 402  
 403  
 404  
 405  
 406  
 407  
 408  
 409  
 410  
 411  
 412  
 413  
 414  
 415  
 416  
 417  
 418  
 419  
 420  
 421  
 422  
 423  
 424  
 425  
 426  
 427  
 428  
 429  
 430  
 431

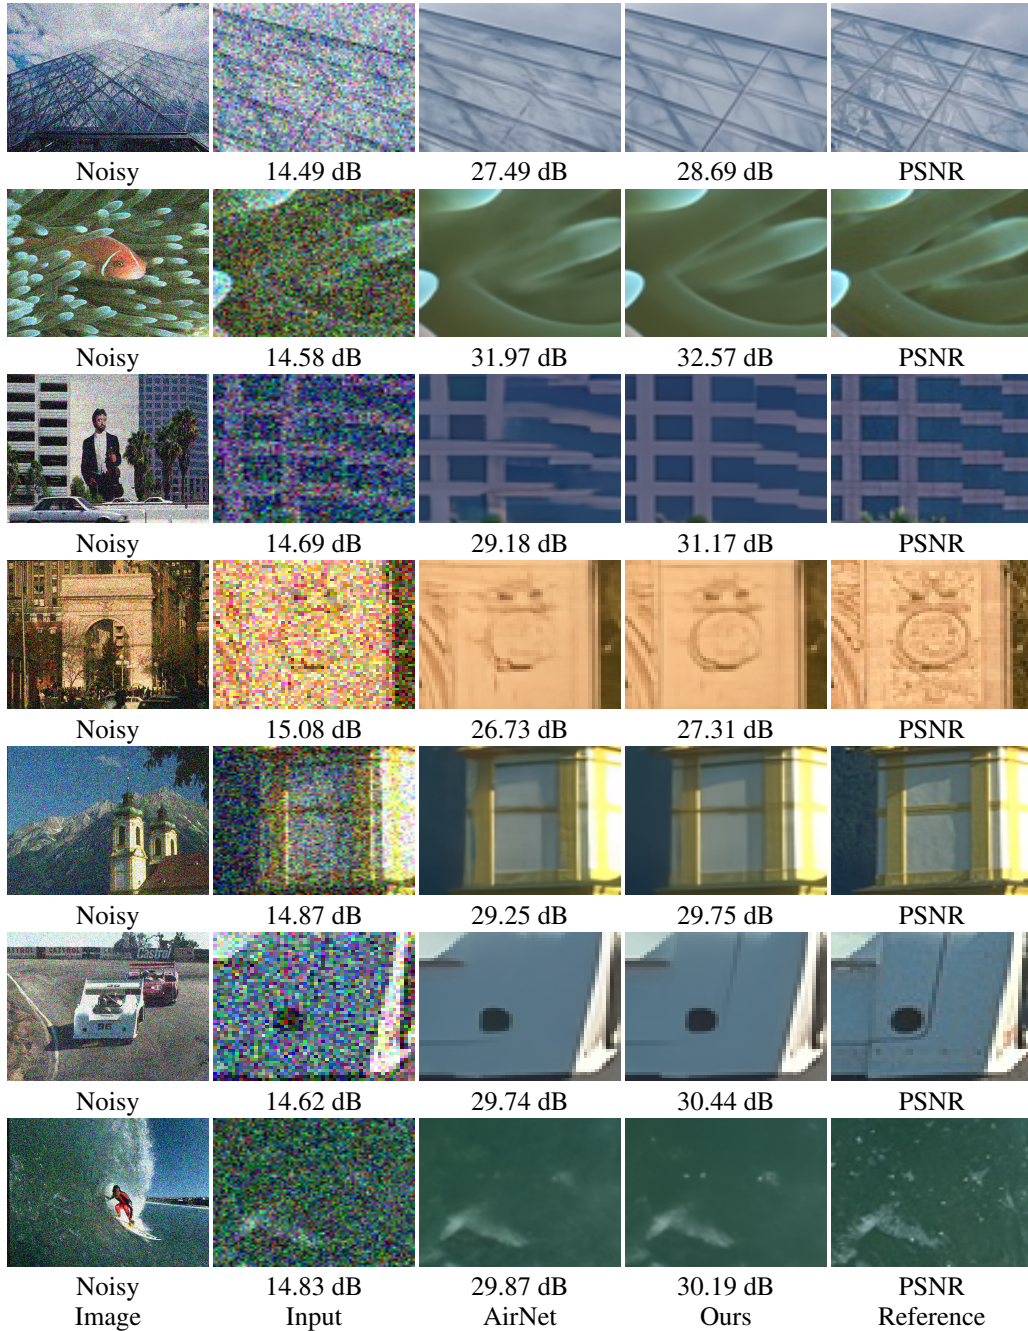

Figure 8: Image denoising results under single task setting on BSD68 (Martin et al., 2001) with  $\sigma = 50$ .
